# Supplementary material for: Computational insights into crystal plane dependence of thermal activity of anion (C and N)-substituted titania
Source: Royal Society of Chemistry journal article supplement (doi:10.1039/c7cp04368f), 2017-01-01
Supplement: c7cp04368f1.pdf [file c7cp04368f1.pdf]

# Computational Insights into Crystal Plane Dependence of Thermal Activity of Anion (C and N)-Substituted Titania

V. Sai Phani Kumar, Rahul Arya and Parag A. Deshpande\*

Quantum and Molecular Engineering Laboratory, Department of Chemical Engineering, Indian Institute of Technology Kharagpur, Kharagpur 721302, India.

## Supporting Information

\*Corresponding author: [parag@che.iitkgp.ernet.in](mailto:parag@che.iitkgp.ernet.in), Phone.: (+91) 3222-283916.

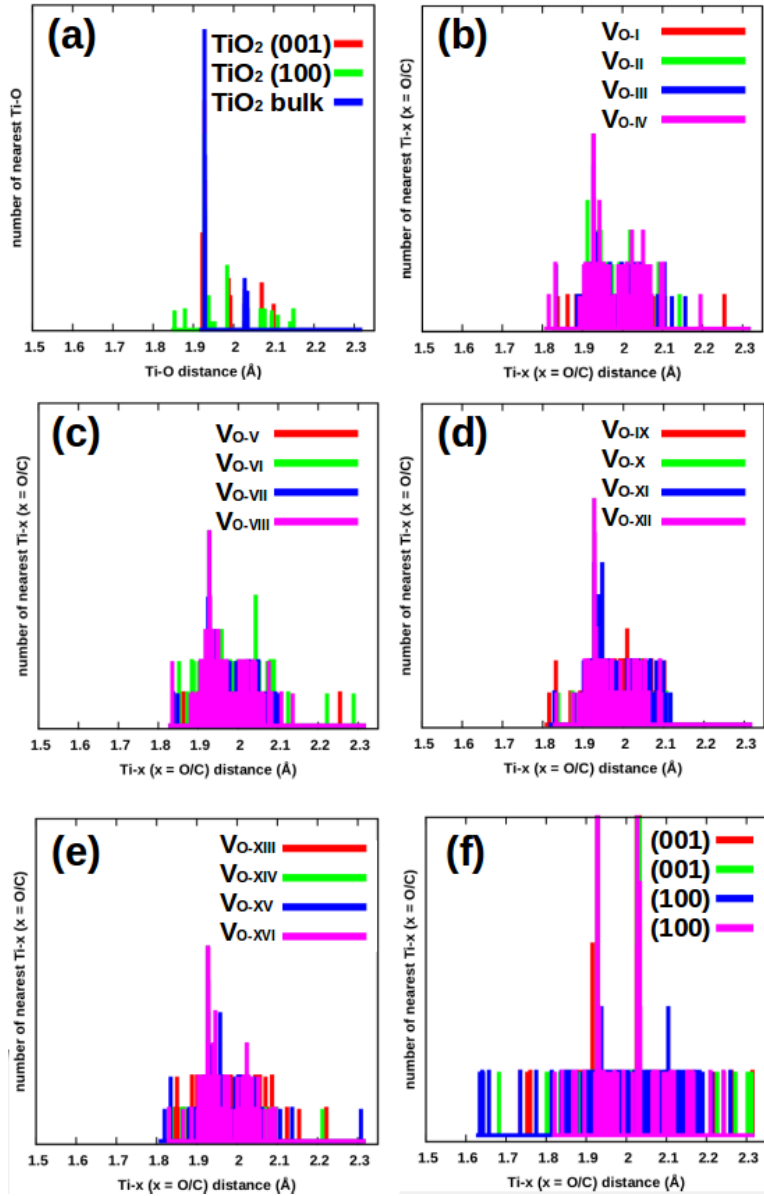

Figure S1: Bond length distribution of (a) surface exposed (001), (100) planes and bulk  $\text{TiO}_2$  (b)  $\text{V}_{\text{O-I}}$ ,  $\text{V}_{\text{O-II}}$ ,  $\text{V}_{\text{O-III}}$  and  $\text{V}_{\text{O-IV}}$  sites (c)  $\text{V}_{\text{O-V}}$ ,  $\text{V}_{\text{O-VI}}$ ,  $\text{V}_{\text{O-VII}}$  and  $\text{V}_{\text{O-VIII}}$  (d)  $\text{V}_{\text{O-IX}}$ ,  $\text{V}_{\text{O-X}}$ ,  $\text{V}_{\text{O-XI}}$  and  $\text{V}_{\text{O-XII}}$  (e)  $\text{V}_{\text{O-XIII}}$ ,  $\text{V}_{\text{O-XIV}}$ ,  $\text{V}_{\text{O-XV}}$  and  $\text{V}_{\text{O-XVI}}$  configurations of  $\text{TiO}_{2-2x}\text{C}_x$  bulk and (f) surface exposed (001) and (100) planes of  $\text{TiO}_{2-2x}\text{C}_x$ .

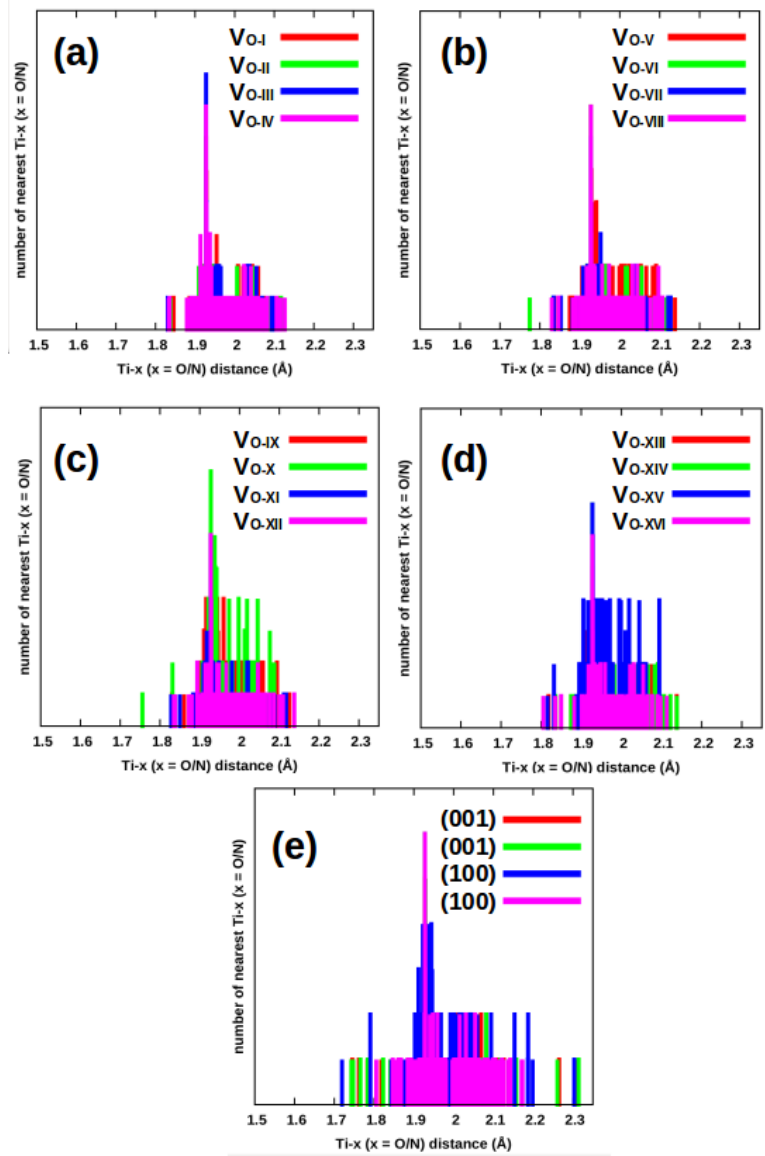

Figure S2: Bond length distribution of (a)  $V_{O-I}$ ,  $V_{O-II}$ ,  $V_{O-III}$  and  $V_{O-IV}$  sites (b)  $V_{O-V}$ ,  $V_{O-VI}$ ,  $V_{O-VII}$  and  $V_{O-VIII}$  (c)  $V_{O-IX}$ ,  $V_{O-X}$ ,  $V_{O-XI}$  and  $V_{O-XII}$  (d)  $V_{O-XIII}$ ,  $V_{O-XIV}$ ,  $V_{O-XV}$  and  $V_{O-XVI}$  configurations of  $TiO_{2-3x}N_{2x}$  bulk and (e) surface exposed (001) and (100) planes of  $TiO_{2-3x}N_{2x}$ .
